# Supplementary material for: An Emerging Role for Sigma-1 Receptors in the Treatment of Developmental and Epileptic Encephalopathies
Source: MDPI journal article supplement (doi:10.3390/ijms22168416), 2021-08-05
Supplement: s1 [file s1]

**Table S1.** Clinical outcomes of fenfluramine treatment for developmental and epileptic encephalopathies.

| Study                                                                      | Treatment Duration                            | Endpoint                                                                                                                        | Results                                                                                                                                                                                                                                                         | Reference          |
|----------------------------------------------------------------------------|-----------------------------------------------|---------------------------------------------------------------------------------------------------------------------------------|-----------------------------------------------------------------------------------------------------------------------------------------------------------------------------------------------------------------------------------------------------------------|--------------------|
| <b>Dravet syndrome, phase 3 RCTs<sup>a,b</sup></b>                         |                                               |                                                                                                                                 |                                                                                                                                                                                                                                                                 |                    |
| Study 1 ( <i>N</i> = 119)                                                  | 14 weeks T + M                                | Change in MCSF from placebo to T + M                                                                                            | 0.7 mg/kg/day FFA: -62.3% ( <i>p</i> < 0.0001)<br>0.2 mg/kg/day FFA: -32.4% ( <i>p</i> = 0.0209)                                                                                                                                                                | Lagae 2020 [8]     |
| Study 2 ( <i>N</i> = 87)                                                   | 15 weeks T + M                                | Change in mean MCSF from placebo to T + M                                                                                       | 0.4 mg/kg/day FFA <sup>c</sup> : -54.0% ( <i>p</i> < 0.001)                                                                                                                                                                                                     | Nabbout 2020 [9]   |
| Study 3 ( <i>N</i> = 143)                                                  | 14 weeks T + M                                | Change in mean MCSF from placebo                                                                                                | 0.7 mg/kg/day FFA: -64.8% ( <i>p</i> < 0.0001)<br>0.2 mg/kg/day FFA: -49.9% ( <i>p</i> < 0.0001)                                                                                                                                                                | Sullivan 2020 [10] |
| <b>Dravet syndrome, OLE</b>                                                | Median: 256 days (range: 46–634)              | Median change in MCSF from baseline in the core study                                                                           | -66.8% ( <i>p</i> < 0.001)                                                                                                                                                                                                                                      | Sullivan 2020 [11] |
| <b>Dravet syndrome, post hoc analyses</b>                                  |                                               |                                                                                                                                 |                                                                                                                                                                                                                                                                 |                    |
| BRIEF <sup>®c</sup>                                                        | 14 weeks T + M                                | Change in BRIEF <sup>®</sup> indexes from baseline to T + M compared to placebo                                                 | Improvement in executive function as measured by the Behavioral Regulation Index at 0.7 mg/kg/day FFA ( <i>p</i> = 0.0117) and 0.2 mg/kg/day FFA ( <i>p</i> = 0.0185)<br>Improvement in Global Executive Composite at 0.7 mg/kg/day FFA ( <i>p</i> = 0.0245)    | Lagae 2020 [8]     |
| BRIEF <sup>®2c</sup> ( <i>N</i> = 58)                                      | 1 year                                        | Change in BRIEF <sup>®2</sup> indexes from baseline to Year 1                                                                   | Improvement in executive function as measured by Emotion Regulation Index and Cognitive Regulation Index in 22% and 24% of patients, respectively, with MCSF reduction ≥50% from core study baseline (vs. 0% in placebo; <i>p</i> = 0.002 and <i>p</i> = 0.001) | Bishop 2021 [12]   |
| SUDEP                                                                      | Up to 32 years                                | Incidence of SUDEP in Dravet syndrome before and during treatment with FFA in US and EU EAP, phase 3 studies, 2 Belgian cohorts | Cooper et al., 2016 ( <i>N</i> = 100; historical controls, no FFA): 9.32 deaths/1000 patient-years<br>No FFA ( <i>N</i> = 366): 11.7 deaths/patient-year<br>FFA ( <i>N</i> = 732): 1.7 deaths/patient-year                                                      | Cross 2020 [13]    |
| <b>LGS RCT<sup>b</sup></b>                                                 | 14 weeks T + M                                | Change in MCSF from placebo to T + M                                                                                            | 0.7 mg/kg/day FFA: -19.9% ( <i>p</i> = 0.0013)<br>0.2 mg/kg/day FFA: -10.5% ( <i>p</i> = NS)                                                                                                                                                                    | Knupp 2020 [7]     |
| BRIEF <sup>®</sup> , RCT <sup>c</sup> ( <i>N</i> = 137)                    | 14 weeks T + M                                | Change in BRIEF <sup>®</sup> indexes from baseline to T + M compared to placebo                                                 | 0.7 or 0.2 mg/kg/day FFA improved aspects of executive function as measured by Cognitive Regulation Index in 27% (vs. 13% placebo; <i>p</i> = 0.046) and Global Executive Composite score in 25% (vs. 11% placebo; <i>p</i> = 0.034)                            | Bishop 2021 [14]   |
| <b>CDD IIS (<i>N</i> = 6)<sup>b</sup></b>                                  | ≥14 weeks T + M                               | Median change in seizure frequency from baseline                                                                                | GTC ( <i>n</i> = 5): -90%<br>TS ( <i>n</i> = 2): -55%                                                                                                                                                                                                           | Devinsky 2021 [15] |
| <b>Sunflower syndrome IIS<sup>b</sup> (<i>N</i> = 5)</b>                   | 1 ( <i>n</i> = 1) or 2 months ( <i>n</i> = 4) | Median change in MCSF from pretreatment baseline                                                                                | -74%                                                                                                                                                                                                                                                            | Thiele 2020 [16]   |
| <b>Sunflower syndrome IIS<sup>b,c</sup> (<i>N</i> = 9 completed study)</b> | 3 months (mean, 47.4 days)                    | ≥30% reduction in hand-waving episodes<br>EEG<br>Mean full-scale IQ score                                                       | 8/9 (89%); 6/9 (67%) experienced ≥70% reduction in hand-waving episodes. In several patients: Reduction in epileptiform activity<br>Resolution of photo-paroxysmal response; slight increase ( <i>p</i> = 0.06)                                                 | Geenen, 2021 [17]  |

<sup>a</sup>Stiripentol was an inclusion criterion for Study 2 and an exclusion criterion for Studies 1 and 3. FFA doses were adjusted for a known pharmacological effect with stiripentol.

<sup>b</sup>Seizure outcomes.

<sup>c</sup>Non-seizure outcomes. BRIEF<sup>®</sup>, Behavior Rating Inventory of Executive Function (BRIEF<sup>®</sup> scores mapped to updated BRIEF<sup>®2</sup> version); BRIEF<sup>®2</sup>, Behavior Rating Index of Executive Function Second Edition; CDD, CDKL5 deficiency disorder; FFA, fenfluramine; IIS, investigator-initiated study; GTC, generalized tonic-clonic seizure; LGS, Lennox-Gastaut syndrome; MCSF, monthly convulsive seizure frequency; NS, not statistically significant; OLE, open-label extension; RCT, randomized clinical trial; SUDEP, sudden unexpected death in epilepsy; T + M, titration and maintenance; TS, tonic seizure.

**Table S2.** Pharmacological and functional targets for fenfluramine and its major metabolite norfenfluramine.

| Target                                                       | Model                                                                                             | Mechanism                                                                                                                                                                                                                                                                                     | Reference                           |
|--------------------------------------------------------------|---------------------------------------------------------------------------------------------------|-----------------------------------------------------------------------------------------------------------------------------------------------------------------------------------------------------------------------------------------------------------------------------------------------|-------------------------------------|
| 5-HT releaser                                                | In vitro: Rat brain synaptosomes;<br><i>Xenopus</i> oocytes<br>In vivo: Rat nucleus accumbens     | SERT substrate, reverse transporter                                                                                                                                                                                                                                                           | Baumann 2014 [4]                    |
| <b>5-HT Receptors</b>                                        |                                                                                                   |                                                                                                                                                                                                                                                                                               |                                     |
| 5-HT <sub>1A</sub>                                           | Radioligand binding in rat cerebral cortex                                                        | FFA: $K_i = 3.27 \times 10^{-7}$ M<br>nFFA: $K_i = 6.73 \times 10^{-7}$ M                                                                                                                                                                                                                     | Martin 2020 [22]                    |
| 5-HT <sub>1A</sub> , CB1                                     | In vitro: GST fusion recombinant protein binding assays                                           | 1. FFA and nFFA activate 5-HT <sub>1A</sub> to inhibit excitatory NMDA activity (i.e., anticonvulsant)                                                                                                                                                                                        | Rodriguez-Munoz 2018 [24]           |
| 5-HT <sub>2A</sub> , 5-HT <sub>2C</sub>                      | In vivo: i.c.v. NMDA injection in mice                                                            | 2. FFA and nFFA agonist activity at 5-HT <sub>2A</sub> and 5-HT <sub>2C</sub> and FFA/nFFA interaction with Sigma1R cooperate to remove Sigma1R/HINT1 coupling with NMDAR, thereby enabling negative control of NMDAR by CaM                                                                  |                                     |
| 5-HT <sub>2A</sub> , 5-HT <sub>2B</sub> , 5-HT <sub>2C</sub> | Radioligand binding in HEK 293E cells; CHO-K1 cells                                               | FFA: weak agonist ( $K_i > 0.7\text{--}1.5 \mu\text{M}$ )<br>nFFA: more potent agonist ( $K_i = 27\text{--}267$ nM)                                                                                                                                                                           | Fitzgerald 2000; Porter 1999 [5, 6] |
| 5HT <sub>3</sub>                                             | Rat SUDEP model                                                                                   | Fluoxetine: Inhibited seizure-induced respiratory arrest at 5-HT <sub>3</sub> without affecting seizures                                                                                                                                                                                      | Faingold 2016 [25]                  |
| 5-HT <sub>4</sub> , 5-HT <sub>2</sub> , 5-HT <sub>7</sub>    | In vivo mouse DBA-1 model of SUDEP                                                                | FFA: Anticonvulsant activity at 5-HT <sub>4</sub> , 5-HT <sub>2</sub> , 5-HT <sub>7</sub><br>FFA: Inhibited seizure-induced respiratory arrest at 5-HT <sub>4</sub>                                                                                                                           | Faingold 2019 [26]                  |
| 5-HT <sub>1D</sub> , 5-HT <sub>2C</sub>                      | Zebrafish <i>scn1Lab</i> <sup>-/-</sup> model of Dravet syndrome                                  | FFA-mediated inhibition of epileptiform activity and hyperlocomotion reduced by 5-HT <sub>1D</sub> and 5-HT <sub>2C</sub> antagonists                                                                                                                                                         | Sourbron 2017 [23]                  |
| <b>Sigma Receptors</b>                                       |                                                                                                   |                                                                                                                                                                                                                                                                                               |                                     |
| Sigma (non-selective)                                        | Radioligand binding in guinea pig brain                                                           | FFA: $K_i = 2.66 \times 10^{-7}$ M<br>nFFA: $K_i = 2.92 \times 10^{-6}$ M                                                                                                                                                                                                                     | Martin 2020 [22]                    |
| Sigma1R                                                      | Assay for Sigma1R activity using the cell-based Sigma1R/BiP dissociation assay                    | FFA: Potentiated activity of PRE-084 (Sigma1R agonist); e.g., shows positive modulatory activity                                                                                                                                                                                              | Martin 2020 [22]                    |
| Sigma1R                                                      | Assay for Sigma1R activity using ex vivo vas deferens contraction model                           | FFA: Potentiated activity of (+)-SKF-10,047 (Sigma1R agonist); e.g., shows positive modulatory activity                                                                                                                                                                                       | Martin 2020 [22]                    |
| Sigma1R                                                      | Mouse model of dizocilpine-induced amnesia                                                        | FFA: Potentiated activity of PRE-084 (Sigma1R agonist) in both spontaneous alternation and passive avoidance tests of learning and memory; e.g., shows positive modulatory activity;<br>all combination effects of FFA and PRE-084 in both tests fully blocked by NE-100 (Sigma1R antagonist) | Martin 2020 [22]                    |
| Sigma1R                                                      | In vitro: GST fusion recombinant protein binding assays<br>In vivo: i.c.v. NMDA injection in mice | Association of Sigma1R with NR1 subunits inhibited by FFA and nFFA<br>NMDA-induced seizures inhibited by FFA and nFFA by preventing Sigma1R/HINT1 association with NR1                                                                                                                        | Rodriguez-Munoz 2018 [24]           |
| Sigma1R                                                      | Zebrafish <i>scn1Lab</i> mutant model of Dravet syndrome                                          | FFA-mediated inhibition of epileptiform activity reduced and FFA-mediated hyperlocomotion completely abolished by Sigma1R agonist PRE-084 in combination with 5-HT <sub>1D</sub> and 5-HT <sub>2C</sub> antagonists                                                                           | Sourbron 2017 [23]                  |
| Sigma1R                                                      | Zebrafish <i>scn1a</i> mutant model of Dravet syndrome                                            | Inhibition of epileptogenic activity by administration of the Sigma1R positive allosteric modulator SOMCL-668                                                                                                                                                                                 | Reported here ( <b>Fig. 3</b> )     |
| Sigma1R                                                      | Sigma1R binding in crude synaptic membrane preparations from rat brain                            | FFA binding with sub-micromolar affinity                                                                                                                                                                                                                                                      | Cagnotto 1994 [27]                  |
| <b>Dendritic Arborization of GABAergic Neurons</b>           |                                                                                                   |                                                                                                                                                                                                                                                                                               |                                     |
| GABAergic neurons                                            | Zebrafish <i>scn1lab</i> mutant                                                                   | Dendritic branching of GABAergic neurons restored by FFA                                                                                                                                                                                                                                      | Tiraboschi 2020 [28]                |

Pharmacological or functional activity has not been reported at 5-HT<sub>3</sub>, 5-HT<sub>5</sub>, 5-HT<sub>6</sub>, or 5-HT<sub>7</sub> receptors. 5-HT, serotonin; BiP, immunoglobulin-binding protein; CaM, calmodulin; CB, cannabinoid; CHO, Chinese hamster ovary; FFA, fenfluramine; GABA,  $\gamma$ -aminobutyric acid; GST, glutathione S-transferase; HEK, human embryonic kidney; HINT1, histidine triad nucleotide binding protein 1; i.c.v., intracerebroventricular; nFFA, norfenfluramine; NMDA, N-methyl-D-aspartate; NMDAR, NMDA receptor; NR, NMDA receptor subunit; SERT, serotonin transporter; Sigma1R, sigma-1 receptor; SOMCL-668, positive Sigma1R modulator.
